# Supplementary material
Source: PubMed Central journal article supplement (PMC4394363)

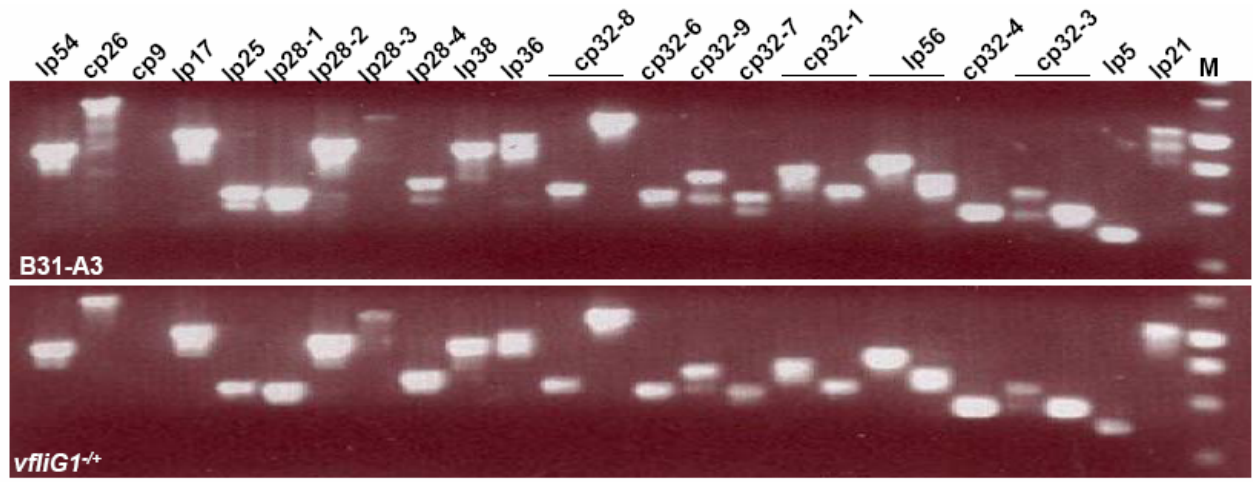

Figure S1. 2 column (6.63 x 2.49)

Supplement: NIHMS677095-supplement-Figure_S1.pdf [file NIHMS677095-supplement-Figure_S1.pdf]
